# Supplementary material for: ER Stress Induces Cell Cycle Arrest at the G2/M Phase Through eIF2α Phosphorylation and GADD45α
Source: MDPI journal article supplement (doi:10.3390/ijms20246309), 2019-12-13
Supplement: s1 [file s1]

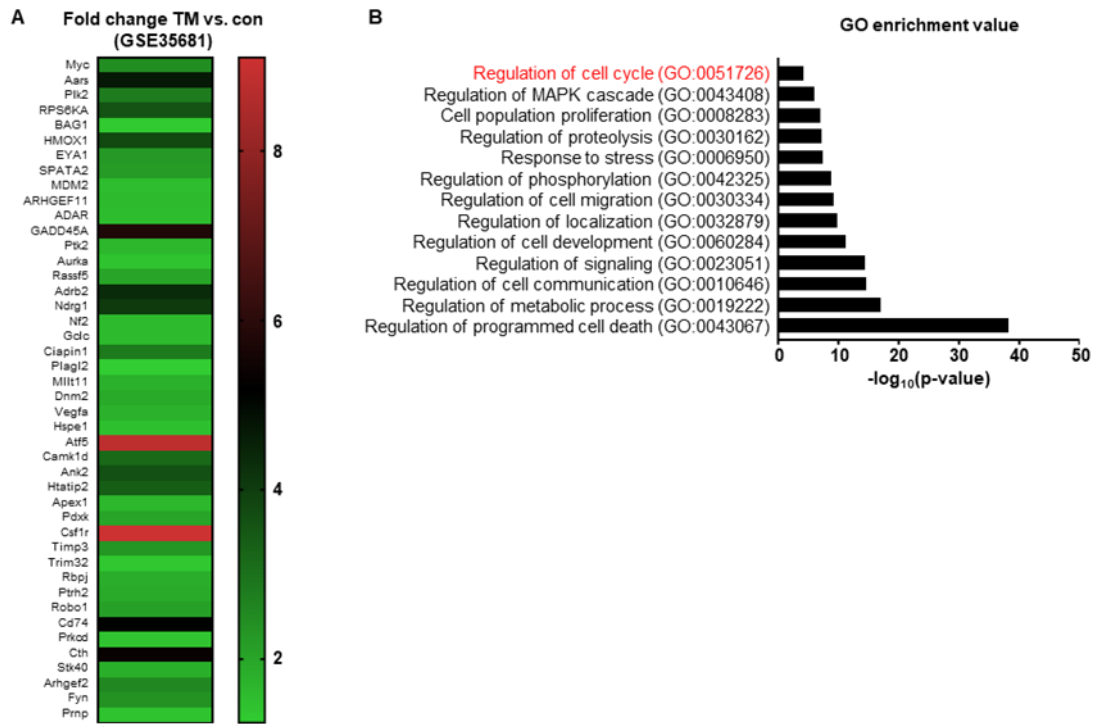

**Figure S1.** (A) Heatmap of the upregulated genes in wild type MEFs with tunicamycin (TM) compared to the control. Data were extracted from GSE35681. (B) Gene ontology (GO) analysis using the PANTHER bioinformatics database derived from GSE35681.
